# Supplementary material for: Photovoltaic performance enhancement of P3HT/PCBM solar cells driven by incorporation of conjugated liquid crystalline rod-coil block copolymers
Source: Royal Society of Chemistry journal article supplement (doi:10.1039/c4tc00066h), 2014-01-01
Supplement: c4tc00066h1.pdf [file c4tc00066h1.pdf]

Supporting information for:

**Photovoltaic Performance Enhancement of P3HT/PCBM Solar Cells Driven by  
Incorporation of Conjugated Liquid Crystalline Rod-coil Block Copolymers**

Kai Yuan<sup>1</sup>, Lie Chen<sup>1</sup>, Yiwang Chen<sup>\*1,2</sup>

<sup>1</sup>Institute of Polymers/Department of Chemistry, Nanchang University, 999 Xuefu Avenue, Nanchang 330031, China; <sup>2</sup>Jiangxi Provincial Key Laboratory of New Energy Chemistry, Nanchang University, 999 Xuefu Avenue, Nanchang 330031, China

**Synthesis of 4''-(dodecyloxy)-[1,1':4',1''-terphenyl]-4-ol (3)**

Under a dry nitrogen atmosphere, a solution of 3.6 g (13.6 mmol) of **1** in 15 mL of ethanol was added to a solution of 2.5 g of 4-(4-bromophenyl)phenol (**2**, 10 mmol) and 0.42 g (0.36 mmol) of Pd(PPh<sub>3</sub>)<sub>4</sub> in 20 mL of toluene and 20 mL of aqueous potassium carbonate (2 M). The reaction was conducted under reflux overnight. The reaction mixture was then shaken with ethyl acetate, and the insoluble parts were filtered off. The organic layer was dried over MgSO<sub>4</sub>, and the solvent was removed by evaporation in vacuo. The crude product was recrystallized from acetone to obtain 4''-(dodecyloxy)-[1,1':4',1''-terphenyl]-4-ol, **3**. <sup>1</sup>H NMR (600 MHz, CDCl<sub>3</sub>), δ (ppm): 7.73-7.65 (m, 8H), 7.53 (d, 2H), 6.93 (d, 2H), 4.91 (s, 1H), 4.05-3.98 (t, 2H), 1.96-0.61 (m, 23H).

**Synthesis of 4-(dodecyloxy)-4''-(oct-7-en-1-yloxy)-1,1':4',1''-terphenyl (terph-vinyl, A)**

1.72g (4 mmol) of **3**, 1.7g K<sub>2</sub>CO<sub>3</sub> (12 mmol), 0.66g (4 mmol) KI dissolved in 20 mL of THF in a two-necked round bottom flask under nitrogen. Then 0.91g (4.8 mmol) 8-bromooct-1-ene was injected. After refluxing at 80 °C overnight, the mixture was cooled and poured into water; the solution was extracted with C<sub>2</sub>H<sub>2</sub>Cl<sub>2</sub>. The organic layer was dried over MgSO<sub>4</sub> and filtered. After solvent evaporated, the residue was purified by silica-gel chromatography. <sup>1</sup>H NMR (600 MHz, CDCl<sub>3</sub>), δ (ppm): 7.56-

---

\* Corresponding author. Tel.: +86 791 83969562; fax: +86 791 83969561. E-mail address: ywchen@ncu.edu.cn (Y. Chen).

7.61 (m, 8H), 6.98 (d, 4H), 5.83 (m, 1H), 4.98 (d, 2H), 4.00 (t, 4H), 2.24-1.95 (m, 2H), 1.76 (d, 4H), 1.54-1.13 (m, 24H), 1.18-0.82 (m, 3H).

### **Synthesis of 2-hexyloxyphenol (5) and 1,2-di(hexyloxy)benzene (6)**

5.49 g (50 mmol) of pyrocatechol (4), 12.01 g (73 mmol) of 1-bromohexane, 20.77 g (0.15 mol) of anhydrous  $K_2CO_3$  and 0.65 g (3.6 mmol) of KI were dissolved in 100 mL of anhydrous ethanol. The solution was stirred and under reflux for 24 h. The mixture solution was filtered after cooled to room temperature. The solvent was removed and the residue was washed with diluted hydrochloric acid and brine, extracted with  $C_2H_2Cl_2$  and dried with anhydrous  $MgSO_4$ . The crude product was purified by silica-gel column chromatography, producing 3.62 g of 2-hexyloxyphenol (5) and 7.83 g of 1,2-di(hexyloxy)benzene (6).

2-hexyloxyphenol:  $^1H$  NMR (600 MHz,  $CDCl_3$ ),  $\delta$  (ppm): 6.91 (m, 1H), 6.82 (m, 3H), 5.73 (s, 1H), 3.98 (t, 2H), 1.77 (m, 2H), 1.45 (m, 2H), 1.33 (m, 4H), 0.91 (t, 3H).

1,2-di(hexyloxy) benzene:  $^1H$  NMR (600 MHz,  $CDCl_3$ ),  $\delta$  (ppm): 6.88 (s, 4H), 3.98 (t, 4H), 1.81 (m, 4H), 1.44 (m, 4H), 1.34 (m, 8H), 0.91 (t, 6H).

### **Synthesis of 2-hydroxy-3,6,7,10,11-penta(hexyloxy)triphenylene (7).**

3g of 2-hexyloxyphenol (5) and 7.24g of 1,2-di(hexyloxy)benzene (6) was dissolved in 30 mL of anhydrous  $C_2H_2Cl_2$  in round-bottom flask. The solution was cooled with an ice-water bath and 23.3 g of anhydrous  $FeCl_3$  was added in portion-wise in 30 min under vigorous stirring. After that, the solution was stirred at room temperature for 1 hour and cooled to 0 °C again. Then 15 mL of cold methanol was slowly added, after stirring for 30 min, 80 mL of water was added and the mixture was extracted with 300 mL of  $C_2H_2Cl_2$  three times. The organic phase was collected and dried with anhydrous  $MgSO_4$ . After solvent was removed, the crude product was purified by silica-gel column chromatography, using petroleum ether/ $C_2H_2Cl_2$  (1:15 v/v) mixture as eluent. 1.8 g of 2-hydroxy-3,6,7,10,11-penta(hexyloxy)triphenylene (7) was obtained as white crystals.

$^1H$  NMR (600 MHz,  $CDCl_3$ ),  $\delta$  (ppm): 7.96 (s, 1H), 7.82 (m, 4H), 7.77 (s, 1H), 5.92

(s, 1H), 4.28-4.23 (m, 10H), 1.93 (m, 10H), 1.56 (m, 10H), 1.38 (m, 20H), 0.93 (t, 15H).

### **Synthesis of 2,3,6,7,10-pentakis(hexyloxy)-11-(oct-7-en-1-yloxy)triphenylene (TP-vinyl, B)**

1.5g (1.5 mmol) of 2-hydroxy-3,6,7,10,11-penta(hexyloxy)triphenylene and 0.62 g (4.5 mmol) of anhydrous  $K_2CO_3$  and 0.75 g (4.5 mmol) of KI were dissolved in 30 mL of DMF in a two-necked round bottom flask under nitrogen. Then 0.35 g (1.8 mmol) 8-bromooct-1-ene was injected. After refluxing at 80 °C for 24 h, the mixture was cooled and poured into water; the solution was extracted with  $C_2H_2Cl_2$ . The organic layer was dried with anhydrous  $MgSO_4$  and filtered. After solvent evaporated, the residue was purified by silica-gel chromatography. Recrystallization from ethanol.  $^1H$  NMR (600 MHz,  $CDCl_3$ ),  $\delta$  (ppm): 7.83 (s, 6H), 5.82 (m, 1H), 5.10-4.87 (m, 2H), 4.21 (m, 12H), 2.08(m, 2H), 1.92-1.85 (m, 12H), 1.56-1.36 (m, 36H), 0.93 (t, 15H).

### **Synthesis of vinyl terminated P3HT (P3HT- vinyl)**

A dry 250 mL three-neck flask was flushed with  $N_2$  and was charged with 2,5-dibromo-3-hexylthiophene (9.8 g, 30 mmol) and anhydrous THF (150 mL). A 2 M solution of butyl magnesium chloride (15 mL, 30 mmol) in diethyl ether ( $Et_2O$ ) was injected via a syringe, and the reaction mixture was refluxed for 90 min. The reaction mixture was cool down to room temperature, at which time  $Ni(dppp)Cl_2$  (0.3 g, 0.55 mmol) was added to the mixture solution. The polymerization was allowed to proceed for 30 min at room temperature followed by the addition of a 1 M solution of vinyl magnesium bromide (6 mL, 6 mmol). The reaction mixture was stirred for 5 min followed by quenching in methanol. The polymer was purified by sequential Soxhlet extractions with methanol, hexanes, and chloroform. The polymer was isolated from the chloroform solution. Polymer was characterized by  $^1H$  NMR. Molecular weight of the polymers was determined by gel permeation chromatography (GPC)  $M_w = 11000$ .

$^1\text{H}$  NMR (600 MHz,  $\text{CDCl}_3$ ):  $\delta_{\text{H}}$  6.98 (s, 1H), 6.61 (t, 1H), 5.52 (d, 2H), 5.13 (d, 2H), 2.80 (t, 2H), 1.66 (t, 2H), 1.35-1.41 (m, 6H), 0.91 (t, 3H).

### Synthesis of hydroxy terminated P3HT (P3HT-OH)

Vinyl terminated P3HT (2.2 g, 0.2 mmol) was dissolved in anhydrous THF (25 mL) under  $\text{N}_2$ . To this reaction mixture, a 0.5 M solution of 9-BBN (4 mL, 2 mmol) in anhydrous THF was added via a syringe. The reaction mixture was stirred for 24 h at 40 °C, at which point a 6 M solution of NaOH (2 mL) was added to the reaction flask. The reaction mixture was stirred for another 15 min (at which point the oil bath was removed). The reaction mixture was allowed to cool down to room temperature followed by addition of a 33% aqueous solution of  $\text{H}_2\text{O}_2$  (2 mL), and the reaction was allowed to proceed for additional 24 h at 40 °C. The **P3HT-OH** was isolated by precipitation in a methanol-water mixture.

$^1\text{H}$  NMR (600 MHz,  $\text{CDCl}_3$ ):  $\delta_{\text{H}}$  6.98 (s, 1H), 3.72 (t, 2H), 3.21 (t, 2H), 2.69 (t, 2H), 1.62 (t, 2H), 1.35-1.43 (m, 6H), 0.91 (d, 3H).

### Synthesis of bromoester terminated poly(3-hexylthiophene) macroinitiator (P3HT-Br)

**P3HT-OH** (2.2 g, 0.2 mmol) was dissolved in anhydrous THF (25 mL) under  $\text{N}_2$ . The reaction mixture was stirred for 15 min at 40 °C followed by addition of triethylamine (18 mL, 132 mmol) and a drop-wise addition of 2-bromoisobutyrate bromide (15 mL, 120 mmol). The reaction mixture was stirred for 24 h at 40 °C. The resulting **P3HT-Br** macroinitiator was precipitated in methanol. Formation of **P3HT-Br** was also confirmed by  $^1\text{H}$ NMR.

$^1\text{H}$  NMR (600 MHz,  $\text{CDCl}_3$ ):  $\delta_{\text{H}}$  6.98 (s, 1H), 4.22 (t, 2H), 3.19 (s, 6H), 3.15 (t, 2H), 1.70 (s, 6H), 1.35-1.41 (m, 6H), 0.91 (t, 3H).

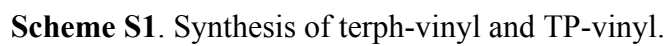

**Scheme S1.** Synthesis of terph-vinyl and TP-vinyl.

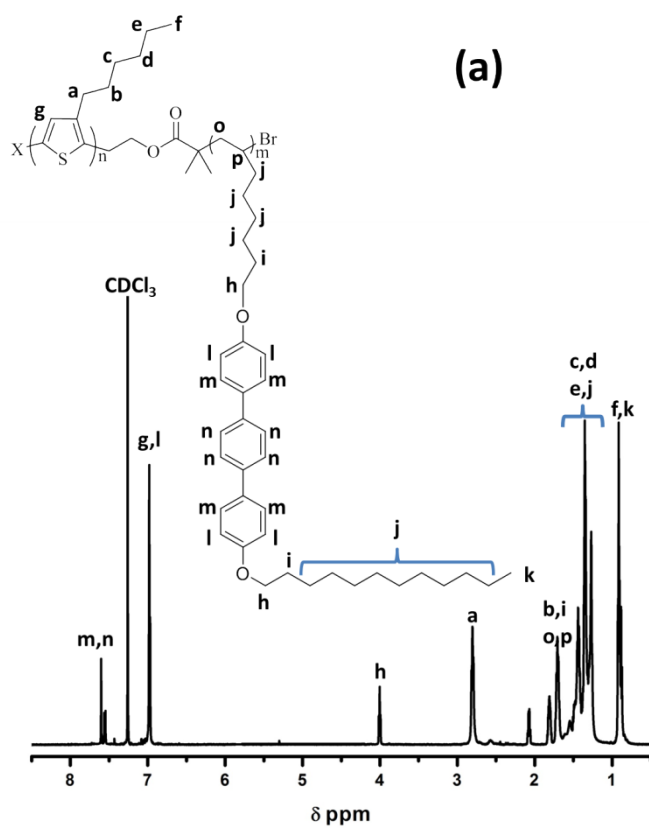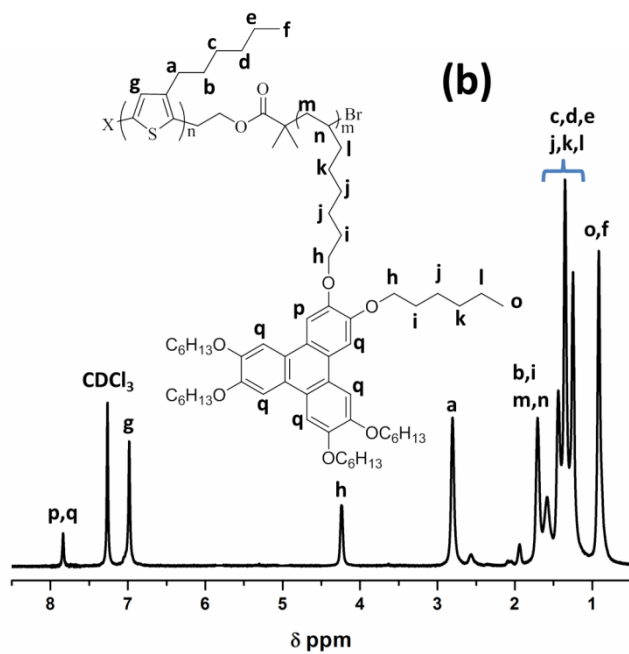

**Figure S1.**  $^1\text{H}$  NMR spectrum of (a) **P3HT-*b*-Pterph** and (b) **P3HT-*b*-PTP**.

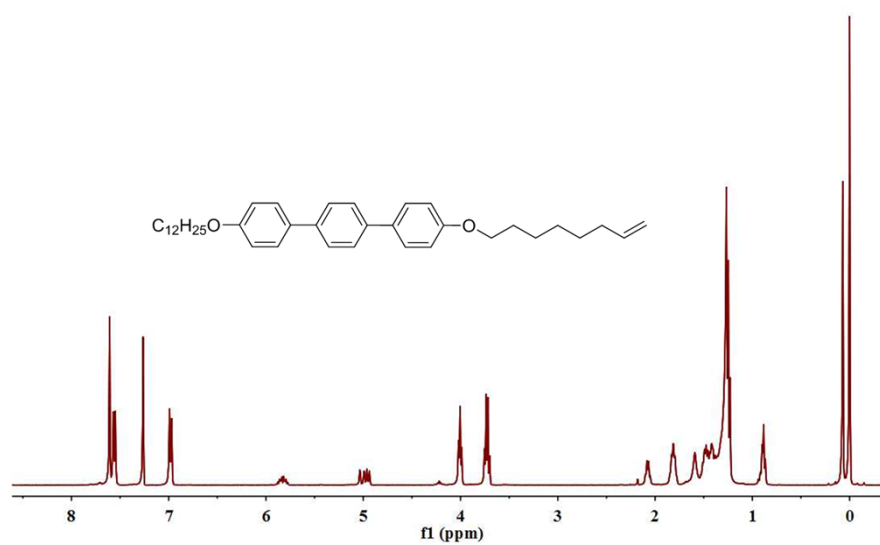

**Figure S2.**  $^1\text{H}$ NMR spectrum of terph-vinyl.

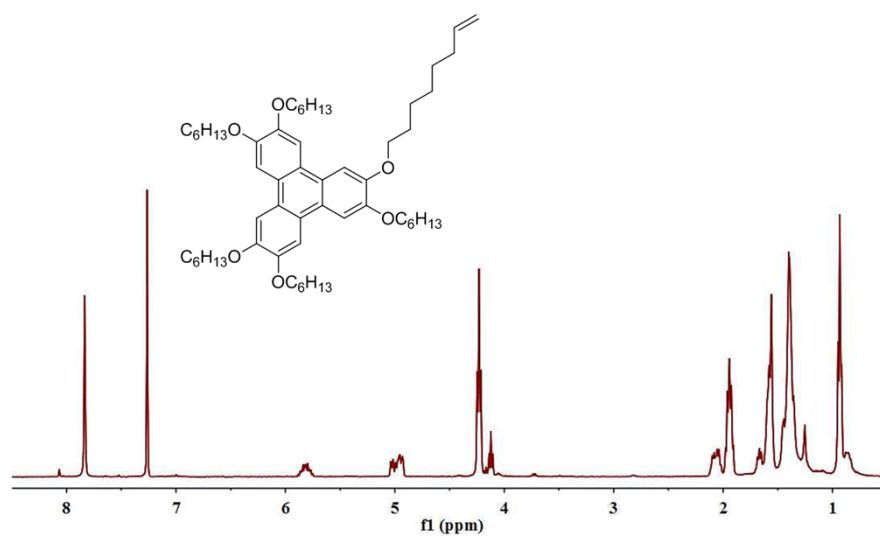

**Figure S3.**  $^1\text{H}$ NMR spectrum of TP-vinyl.

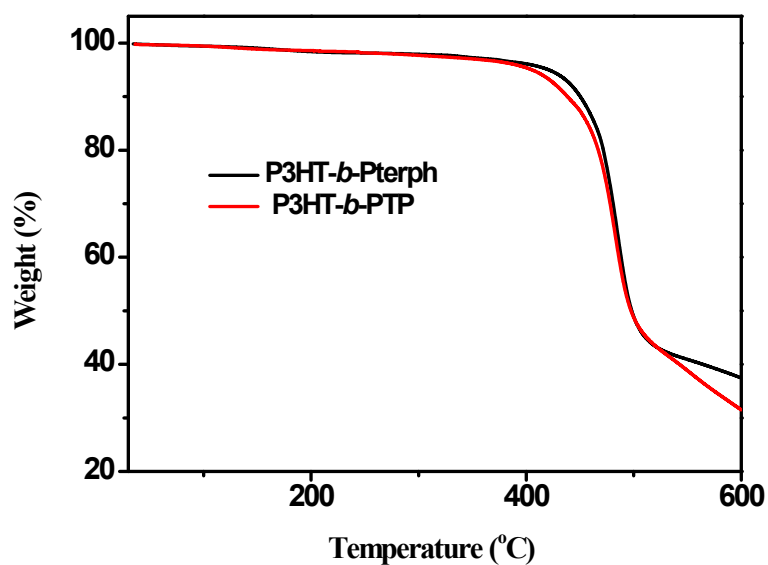

**Figure S4.** TG thermograms of **P3HT-*b*-Pterph** and **P3HT-*b*-PTP** under nitrogen at a heating rate of 10 °C/min.

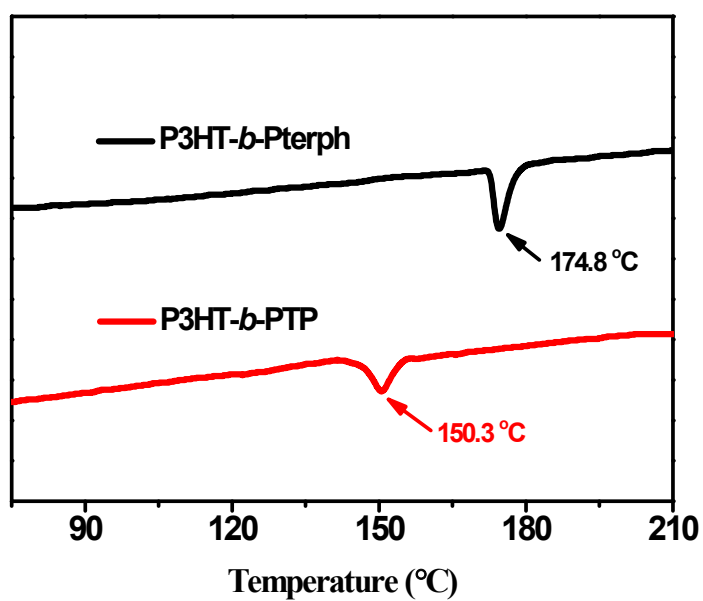

**Figure S5.** Differential scanning calorimetry (DSC) scans for **P3HT-*b*-Pterph** and **P3HT-*b*-PTP** during a second heating at a rate of 5 °C/min.



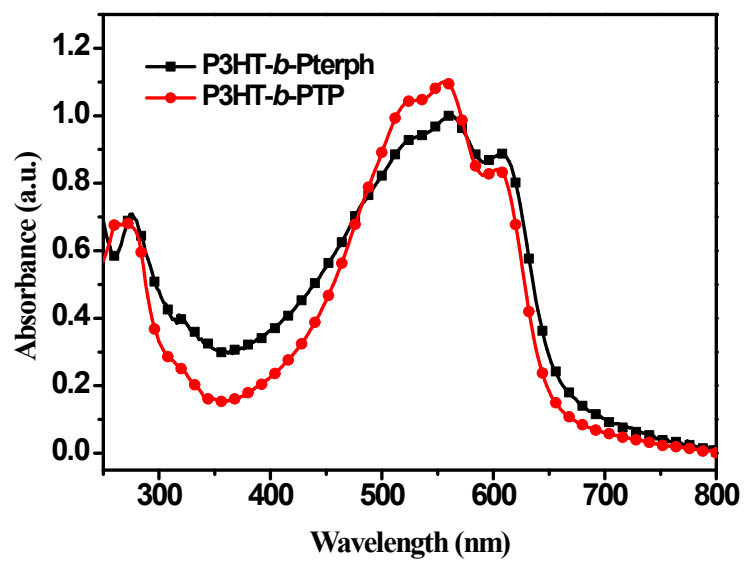

**Figure S6.** Absorbance spectra of **P3HT-*b*-Pterph** and **P3HT-*b*-PTP**.

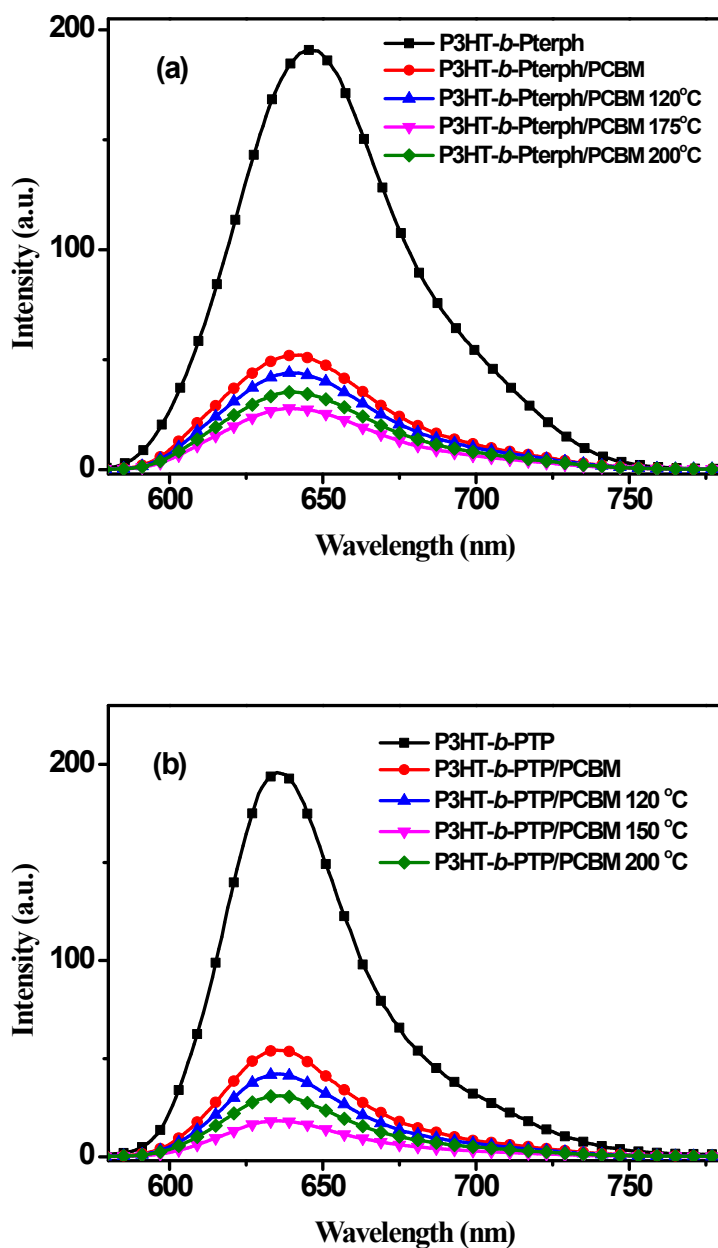

**Figure S10.** Fluorescence spectra for (a) pristine **P3HT-*b*-Pterph** and **P3HT-*b*-PTP/PCBM** (b) pristine **P3HT-*b*-Pterph** and **P3HT-*b*-PTP/PCBM** films before and after annealing at different temperatures under N<sub>2</sub> atmosphere. (monitored at  $\lambda_{\text{exc}} = 460$  nm)

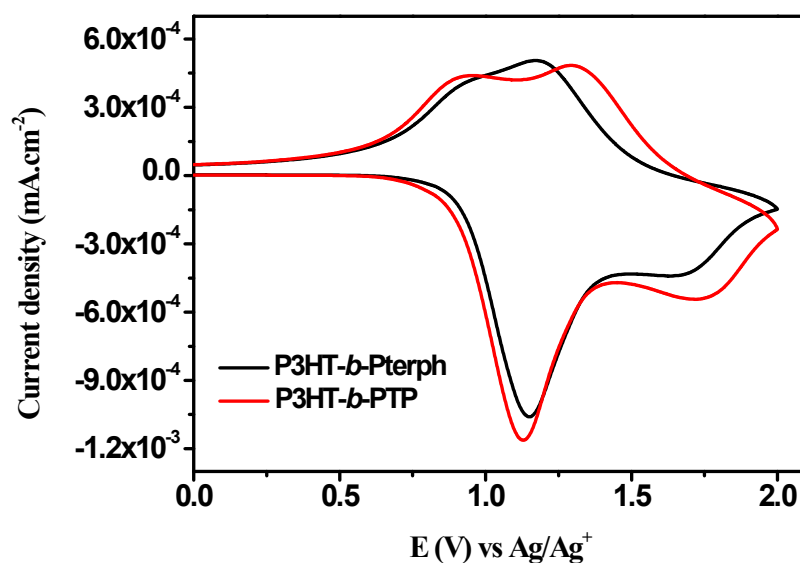

**Figure S7.** Cyclic voltammetry (CV) plots of **P3HT-*b*-Pterph** and **P3HT-*b*-PTP** data using  $\text{Ag}/\text{Ag}^+$  reference. CV were performed in a three-electrode cell using platinum electrodes at a scan rate of  $50 \text{ mV s}^{-1}$  and a  $\text{Ag}/\text{Ag}^+$  (0.1 M of  $\text{AgNO}_3$  in acetonitrile) reference electrode in an anhydrous and nitrogen-saturated solution of 0.1 M tetrabutylammonium tetrafluoroborate ( $\text{Bu}_4\text{NBF}_4$ ) in acetonitrile.

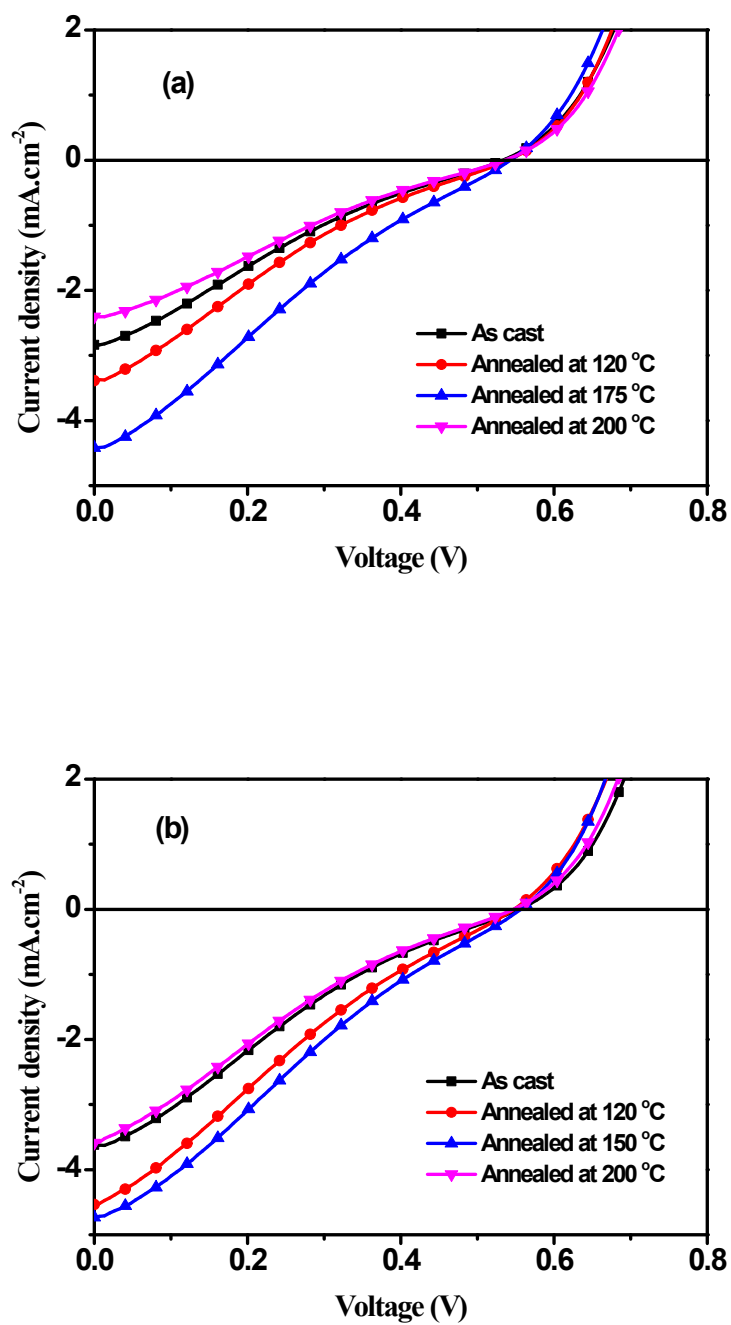

**Figure S8.**  $J$ - $V$  characteristics of photovoltaic cells based on (a) **P3HT-*b*-Pterph** /PCBM (b) **P3HT-*b*-PTP**/PCBM films at different thermal treatments under  $\text{N}_2$  atmosphere under AM 1.5G illumination from a calibrated solar simulator with an intensity of 100  $\text{mW/cm}^2$ .

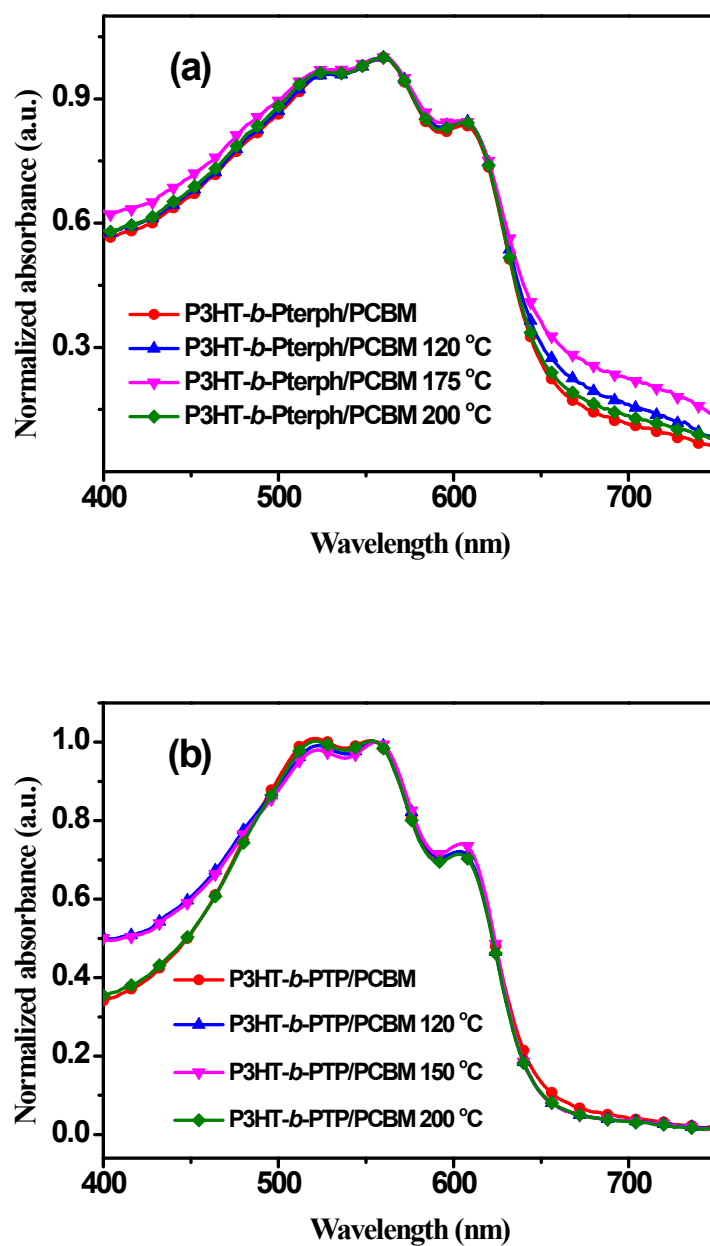

**Figure S9.** Normalized absorbance spectra of (a) **P3HT-*b*-Pterph/PCBM** and (b) **P3HT-*b*-PTP/PCBM** films before and after annealing at different temperatures under  $N_2$  atmosphere.

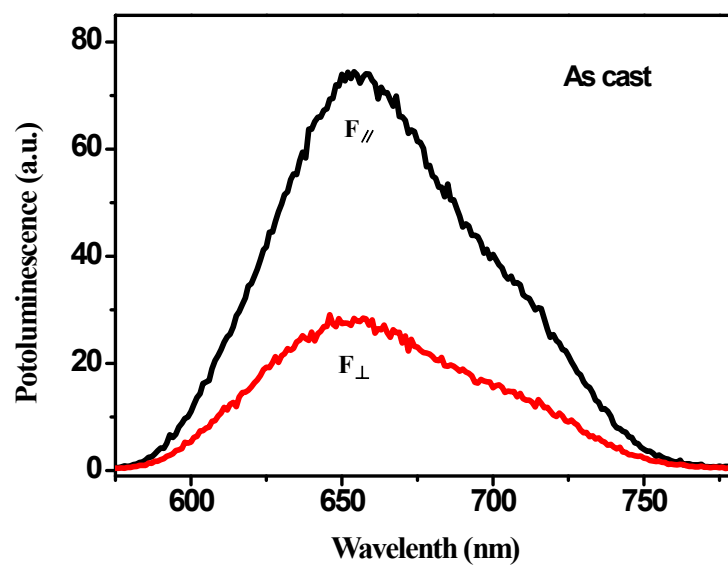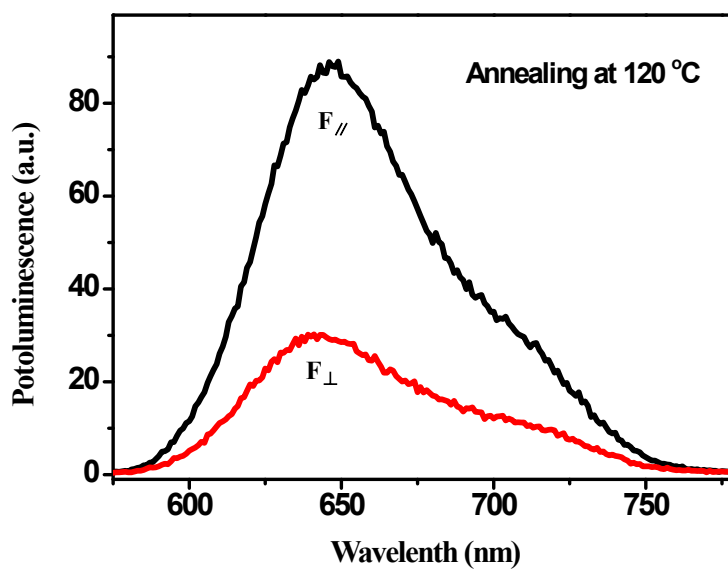

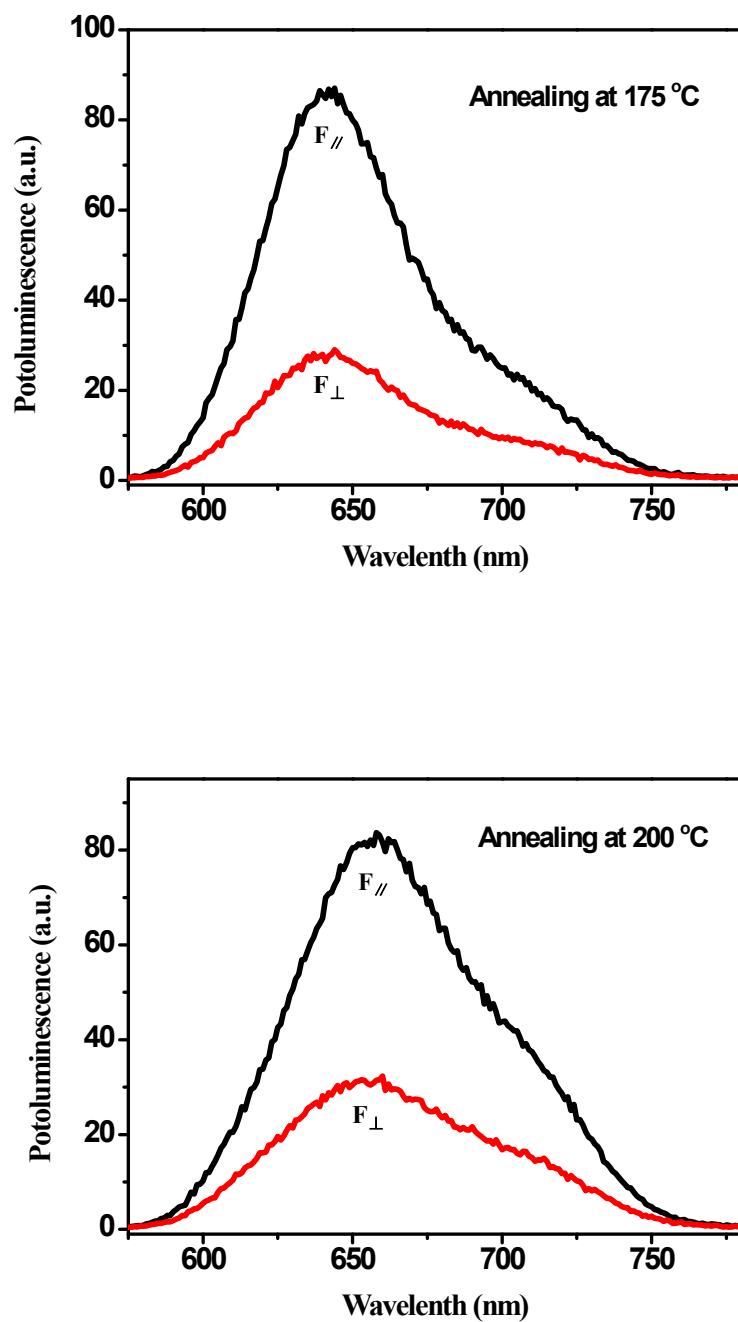

**Figure S11.** Polarized photoluminescence spectra of **P3HT-*b*-Pterph/PCBM** films before and after annealing at different temperatures under  $N_2$  atmosphere.  $F_{//}$  is the fluorescence intensity for parallel irradiation, and  $F_{\perp}$  is the fluorescence intensity for perpendicular irradiation.

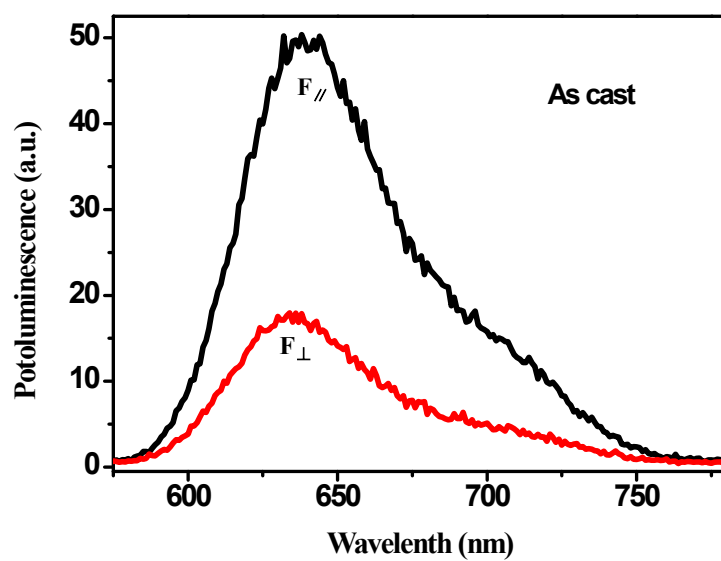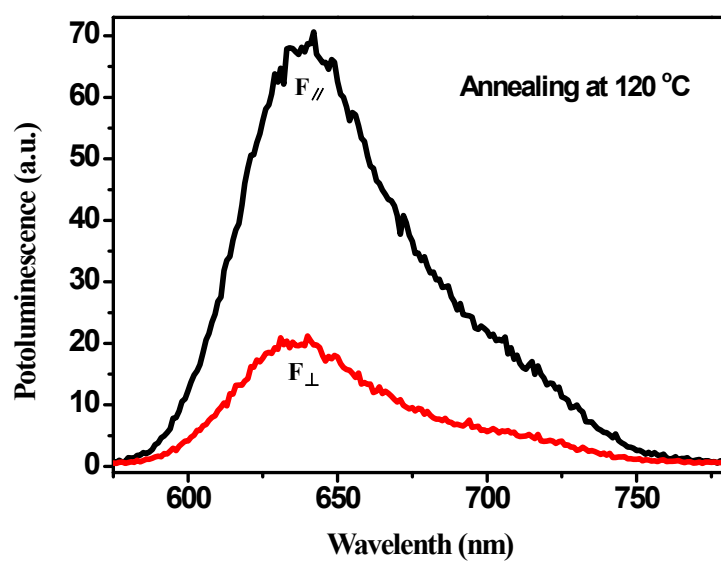



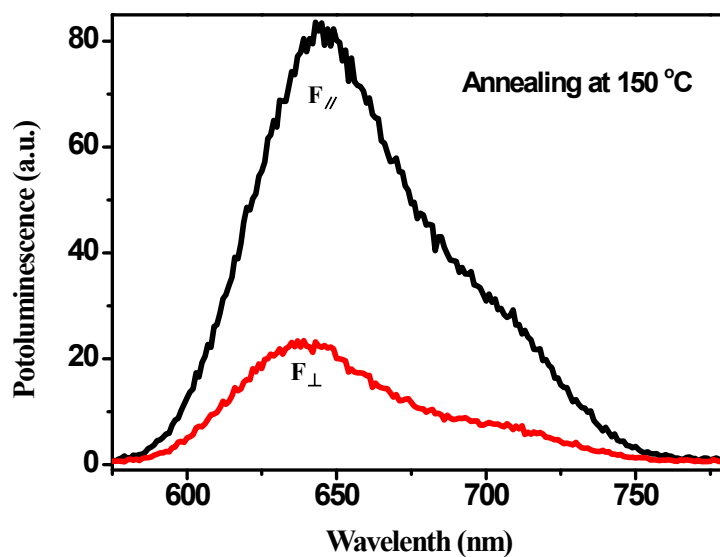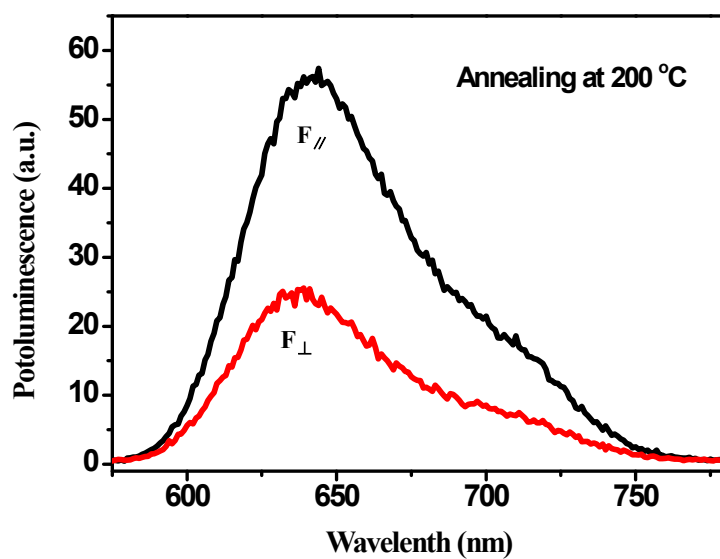

**Figure S12.** Polarized photoluminescence spectra of **P3HT-*b*-Pterph/PCBM** films before and after annealing at different temperatures under N<sub>2</sub> atmosphere. F<sub>//</sub> is the fluorescence intensity for parallel irradiation, and F<sub>⊥</sub> is the fluorescence intensity for perpendicular irradiation.

**Table S1.** Dichroic data ( $N_F$ )<sup>a</sup> of **P3HT-*b*-Pterph** and **P3HT-*b*-PTP** based active layers before and after annealing at different temperatures under N<sub>2</sub> atmosphere.

|                                      |         |      |      |      |
|--------------------------------------|---------|------|------|------|
| Anneal temperature (°C) <sup>b</sup> | As cast | 120  | 175  | 200  |
| $N_F$                                | 2.68    | 3.03 | 3.35 | 2.64 |
| Anneal temperature (°C) <sup>c</sup> | As cast | 120  | 150  | 200  |
| $N_F$                                | 2.77    | 3.45 | 3.61 | 2.24 |

<sup>a</sup> The dichroic ratios ( $N$ ) of the active layers were determined from the polarized fluorescence spectra, using eqn.  $N_F = F_{//} / F_{\perp}$ , where  $N_F$  is the dichroic ratio of fluorescence,  $F_{//}$  is the fluorescence intensity for parallel irradiation, and  $F_{\perp}$  is the fluorescence intensity for perpendicular irradiation. <sup>b</sup> Active layer based on **P3HT-*b*-Pterph**/PCBM. <sup>c</sup> Active layer based on **P3HT-*b*-PTP**/PCBM.

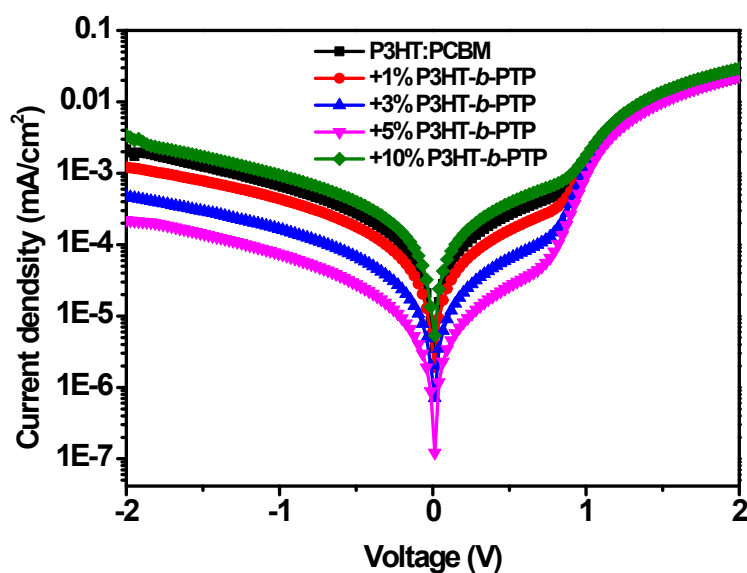

**Figure S13.** Dark  $J$ - $V$  characteristics of devices based on P3HT:PCBM: **P3HT-*b*-PTP** with various weight ratio of **P3HT-*b*-PTP** after annealed at 150 °C under N<sub>2</sub> atmosphere.

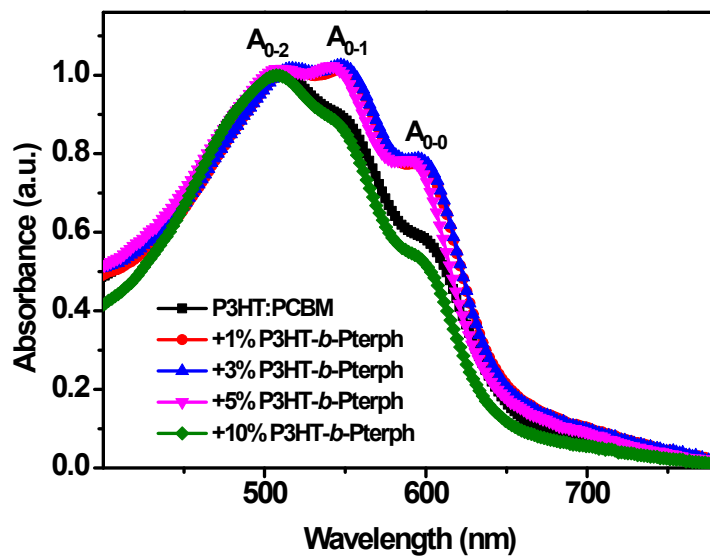

**Figure S14.** Normalized absorption spectra of P3HT:PCBM and P3HT:PCBM:  
**P3HT-*b*-Pterph** films with various weight ratio of **P3HT-*b*-Pterph** after annealed at  
 175 °C under N<sub>2</sub> atmosphere.

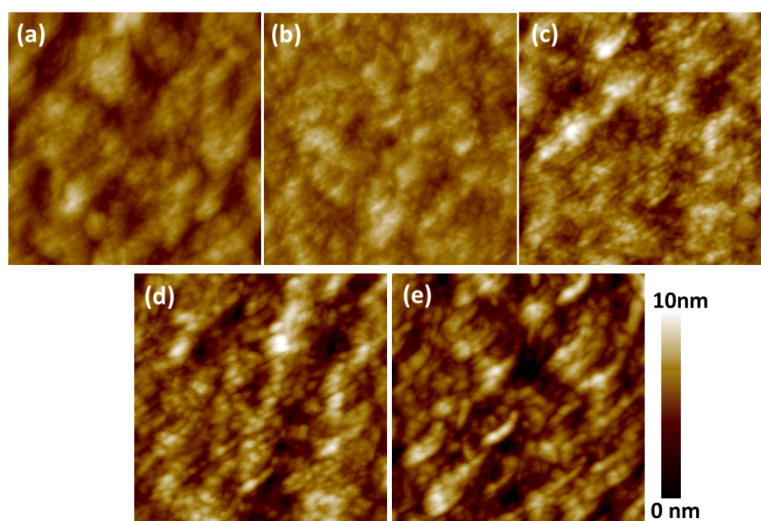

**Figure S15.**  $5\ \mu\text{m} \times 5\ \mu\text{m}$  tapping-mode AFM topography height images of P3HT:PCBM and P3HT:PCBM: **P3HT-*b*-Pterph** films with various weight ratio of **P3HT-*b*-Pterph** after annealed at  $175\ ^\circ\text{C}$  under  $\text{N}_2$  atmosphere.

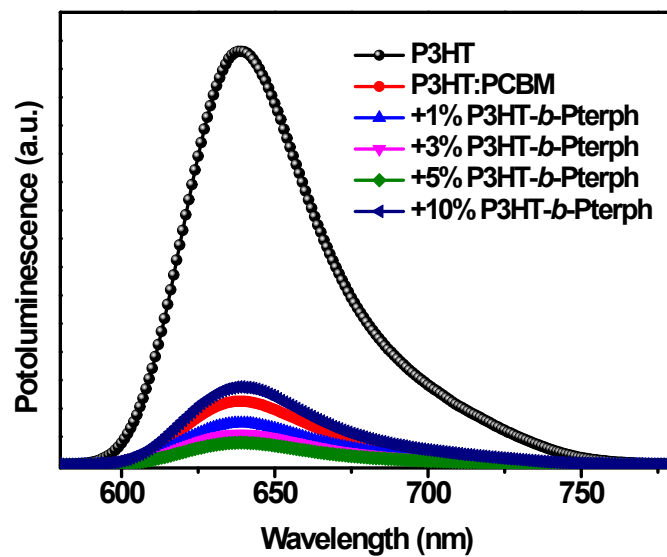

**Figure S16.** PL spectra of P3HT, P3HT:PCBM and P3HT:PCBM: **P3HT-*b*-Pterph** films with various weight ratio of **P3HT-*b*-Pterph** after annealed at 175 °C under N<sub>2</sub> atmosphere.
